# The Interaction of LFA-1 on Mononuclear Cells and ICAM-1 on Tubular Epithelial Cells Accelerates TGF- $\beta$ 1-Induced Renal Epithelial-Mesenchymal Transition

Yoshiyuki Morishita<sup>1\*</sup>, Minami Watanabe<sup>1</sup>, Eiko Nakazawa<sup>1</sup>, Kenichi Ishibashi<sup>2</sup>, Eiji Kusano<sup>1</sup>

<sup>1</sup> Division of Nephrology, Department of Medicine, Jichi Medical University, Tochigi, Japan, <sup>2</sup> Department of Medical Physiology, Meiji Pharmaceutical University, Tokyo, Japan

## Abstract

The epithelial-mesenchymal transition (EMT) of renal epithelial cells (RTECs) has pivotal roles in the development of renal fibrosis. Although the interaction of lymphocyte function-associated antigen 1 (LFA-1) on leukocytes and its ligand, intracellular adhesion molecule 1 (ICAM-1), plays essential roles in most inflammatory reactions, its pathogenetic role in the EMT of RTECs remains to be clarified. In the present study, we investigated the effect of the interaction of LFA-1 on peripheral blood mononuclear cells (PBMCs) and ICAM-1 on HK-2 cells after stimulation with TGF- $\beta$ 1 on the EMT of RTECs. ICAM-1 was highly expressed in HK-2 cells. After TGF- $\beta$ 1 stimulation, the chemokines CCL3 and CXCL12 increased on HK-2 cells. After co-culture of PBMCs and HK-2 cells pre-stimulated with TGF- $\beta$ 1 (0.1 ng/ml) (HK-2-TGF- $\beta$ 1 (0.1)), the expression of the active form of LFA-1 increased on PBMCs; however, total LFA-1 expression did not change. The expression of the active form of LFA-1 on PBMCs did not increase after co-culture with not CCL3 but CXCL12 knockdown HK-2-TGF- $\beta$ 1 (0.1). The expression of epithelial cell junction markers (E-cadherin and occludin) further decreased and that of mesenchymal markers (vimentin and fibronectin) further increased in HK-2-TGF- $\beta$ 1 (0.1) after co-culture with PBMCs for 24 hrs (HK-2-TGF- $\beta$ 1 (0.1)-PBMCs). The phosphorylation of ERK 1/2 but not smad2 and smad3 increased in HK-2-TGF- $\beta$ 1 (0.1)-PBMCs. The snail and slug signaling did not increase HK-2-TGF- $\beta$ 1 (0.1)-PBMCs. Although the migration and invasion of HK-2 cells induced full EMT by a high dose (10.0 ng/ml) and long-term (72–96 hrs) TGF- $\beta$ 1 stimulation increased, that of HK-2-TGF- $\beta$ 1 (0.1)-PBMCs did not increase. These results suggested that HK-2 cells stimulated with TGF- $\beta$ 1 induced conformational activation of LFA-1 on PBMCs by increased CXCL12. Then, the direct interaction of LFA-1 on PBMCs and ICAM-1 on HK-2 cells activated ERK1/2 signaling to accelerate the part of EMT of HK-2 cells induced by TGF- $\beta$ 1.

**Citation:** Morishita Y, Watanabe M, Nakazawa E, Ishibashi K, Kusano E (2011) The Interaction of LFA-1 on Mononuclear Cells and ICAM-1 on Tubular Epithelial Cells Accelerates TGF- $\beta$ 1-Induced Renal Epithelial-Mesenchymal Transition. PLoS ONE 6(8): e23267. doi:10.1371/journal.pone.0023267

**Editor:** Dimas Tadeu Covas, University of Sao Paulo – USP, Brazil

**Received:** December 17, 2010; **Accepted:** July 14, 2011; **Published:** August 5, 2011

**Copyright:** © 2011 Morishita et al. This is an open-access article distributed under the terms of the Creative Commons Attribution License, which permits unrestricted use, distribution, and reproduction in any medium, provided the original author and source are credited.

**Funding:** This work was in part supported by grants from The Kidney Foundation, Japan (JFL 11-3), and Jichi Medical University Young Investigator award. The funders had no role in study design, data collection and analysis, decision to publish, or preparation of the manuscript.

**Competing Interests:** The authors have declared that no competing interests exist.

\* E-mail: ymori@jichi.ac.jp

## Introduction

Regardless of the underlying etiology, tubulointerstitial fibrosis is a common mechanism in the progression of chronic kidney disease (CKD) to end-stage renal disease [1,2]. This progressive pathway involves interstitial infiltration by inflammatory mononuclear leukocytes [1,3]. Integrin lymphocyte function-associated antigen 1 (LFA-1:  $\alpha_L\beta_2$  integrin) is the predominant integrin on leukocytes and an important molecule in firm adhesion and migration of leukocytes to inflammatory sites [4,5]. LFA-1 also plays pivotal roles as a signal transduction molecule by binding its ligand, namely, intracellular adhesion molecule 1 (ICAM-1) [6,7]. Normally, LFA-1 is expressed in a low-affinity state for its ligand and, thus, cells do not make unnecessary adhesive contacts while in circulation [8,9]. The affinity of LFA-1 for ICAM-1 is mediated by a conformational change of LFA-1 and they play essential roles in most inflammatory reactions [8,9]. ICAM-1 has been reported to be expressed on renal tubular epithelial cells (RTECs) and the expression of ICAM-1 on RTECs was found to be associated with the infiltration of leukocytes in CKD [10,11]. An experimental animal study showed that ICAM-1 was promptly up-regulated after renal injury and leukocyte infiltration subsequently occurred

[12]. Kelly et al. reported that anti-ICAM-1 mAb mitigated leukocyte infiltration in tubulointerstitial space in an ischemic renal injury animal model [13]. Although these results suggested that ICAM-1 on RTECs and LFA-1 on leukocytes have some roles in the progression of renal diseases, the pathogenetic roles of their direct interaction in renal fibrosis remain unclear.

Epithelial-mesenchymal transition (EMT) plays pivotal roles in organ fibrosis including that of kidney [14,15]. It has been reported that a large proportion of the interstitial fibroblasts in fibrotic kidneys originate from proximal tubular cells [16]. Therefore, it is important to identify the molecules involved in the induction and progression of EMT of RTECs. TGF- $\beta$ 1 is up-regulated in the fibrotic kidney and is the main inducer of EMT of RTECs [17–18]. In the present study, we investigated the roles of the interaction of LFA-1 on peripheral blood mononuclear cells (PBMCs) and ICAM-1 on RTECs after stimulation of TGF- $\beta$ 1 on the EMT.

## Results

### ICAM-1 expression on HK-2 cells

ICAM-1 was highly expressed on HK-2 cells. ICAM-1 expression decreased with TGF- $\beta$ 1 stimulation at concentrations of

10.0 ng/ml, 1.0 ng/ml and 0.1 ng/ml after 24 hrs in a dose-dependent manner (Figure 1A); its expression also showed a time-dependent decrease at 24 hrs, 48 hrs and 72 hrs after TGF- $\beta_1$  (10.0 ng/ml) stimulation (Figure 1B). However, its expression was still maintained at a high level.

#### TGF- $\beta_1$ increased the expression of chemokines that mediate LFA-1 activation of PBMCs on HK-2 cells

The change of expression of chemokines that mediate LFA-1 activation on PBMCs, such as CCL2, CCL3, CCL4, CCL5, CCL17, CCL19, CCL20, CCL21, CCL22 and CXCL12, was investigated on HK-2 cells after stimulation of TGF- $\beta_1$  (10.0 ng/ml, 1.0 ng/ml and 0.1 ng/ml). Although the expression of CCL2 decreased, the expression of CCL3 and CXCL12 increased on HK-2 cells after TGF- $\beta_1$  stimulation at concentrations of 10.0 ng/ml, 1.0 ng/ml and 0.1 ng/ml for 24 hrs in a dose-dependent manner (Figure 2). The expression of CCL21 was not changed on HK-2 cells after TGF- $\beta_1$  stimulation (Figure 2). CCL4, CCL5,

CCL17, CCL19, CCL20 and CCL22 were not detected on HK-2 cells either before or after TGF- $\beta_1$  stimulation (data not shown).

#### HK-2 cells stimulated with TGF- $\beta_1$ induced the conformational activation of LFA-1 on PBMCs

We investigated the conformational activation change of LFA-1 on PBMCs by HK-2 cells after stimulation with TGF- $\beta_1$  (0.1 ng/ml). We employed flow cytometry using anti-LFA-1 mAb (clone: TS1/22) to detect total LFA-1 on PBMCs and anti-active form LFA-1 mAb (clone: AL-57) that reacted only with the active form of LFA-1 but not with the resting form of LFA-1 to detect conformational activation of LFA-1 on PBMCs. After co-culture with HK-2 cells stimulated by TGF- $\beta_1$  (0.1 ng/ml) for 30 minutes, AL57-positive cells were significantly increased, whereas TS1/22-positive cells were not changed on PBMCs. AL57-positive cells on PBMCs did not change by co-culture with HK-2 cells without TGF- $\beta_1$  and TGF- $\beta_1$  alone (Figure 3A). Next, we investigated the effect of CCL3 and CXCL12 of HK-2 cells on the LFA-1

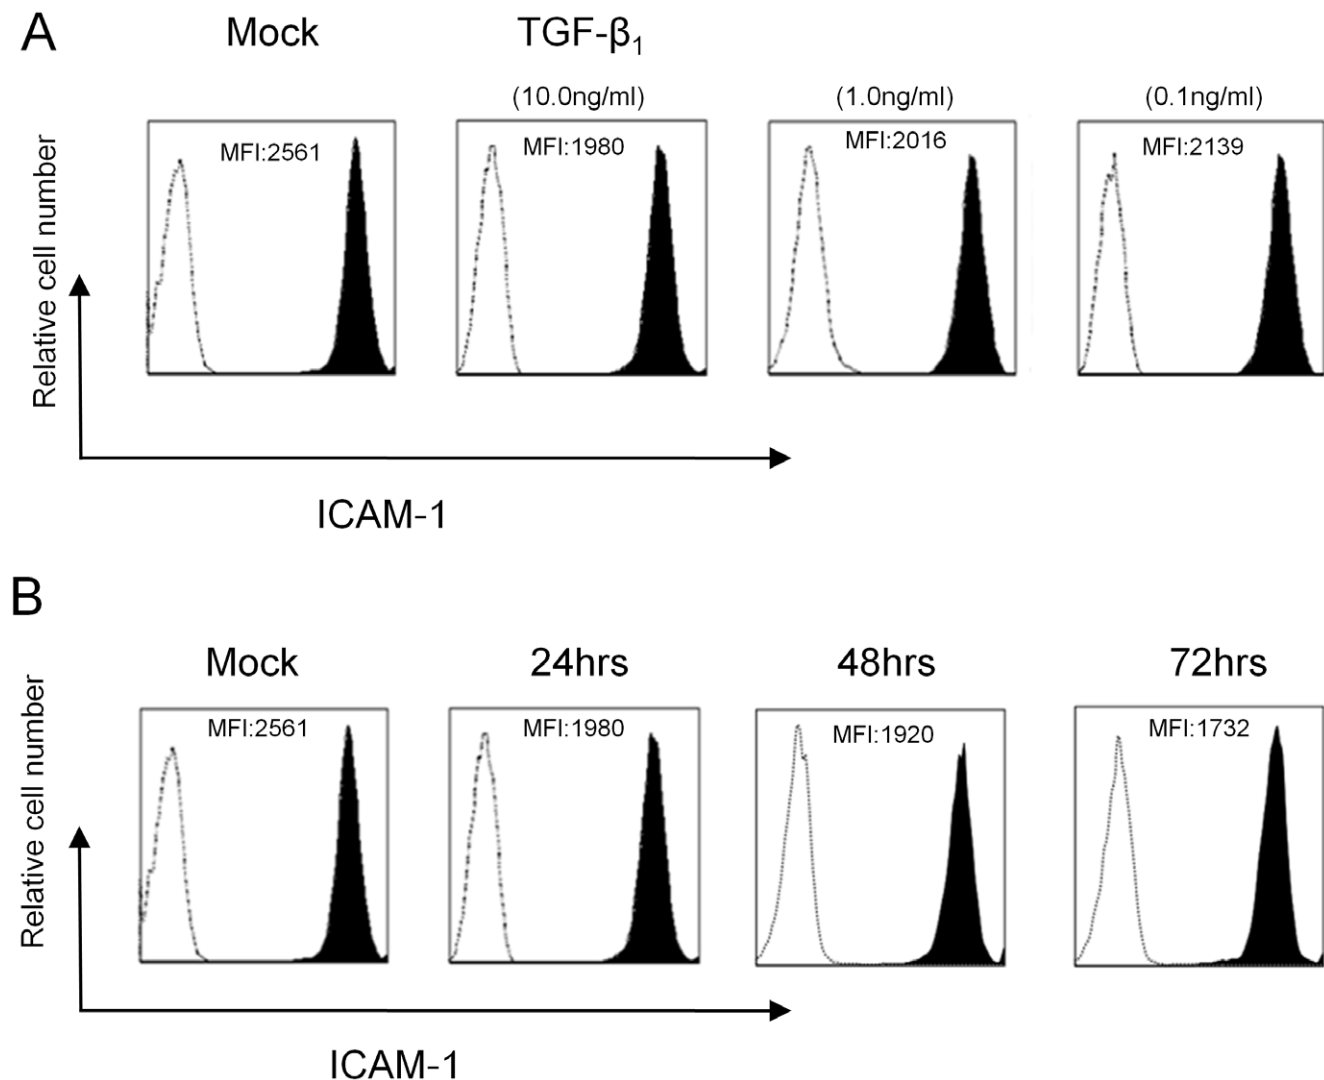

**Figure 1. ICAM-1 expression on HK-2 cells.** HK-2 cells (Mock) and HK-2 cells stimulated with TGF- $\beta_1$  (10.0, 1.0 and 0.1 ng/ml) were stained with anti-ICAM-1 mAb and isotype control mAb (A). HK-2 cells (Mock) and HK-2 cells stimulated with TGF- $\beta_1$  (10.0 ng/ml) were stained with anti-ICAM-1 mAb and isotype control mAb at 24 hrs, 48 hrs and 72 hrs after TGF- $\beta_1$  stimulation (B). Cells were analyzed by flow cytometry. Closed histogram: ICAM-1-stained cells. Dotted line: isotype control stained cells. MFI: mean fluorescence intensity. doi:10.1371/journal.pone.0023267.g001

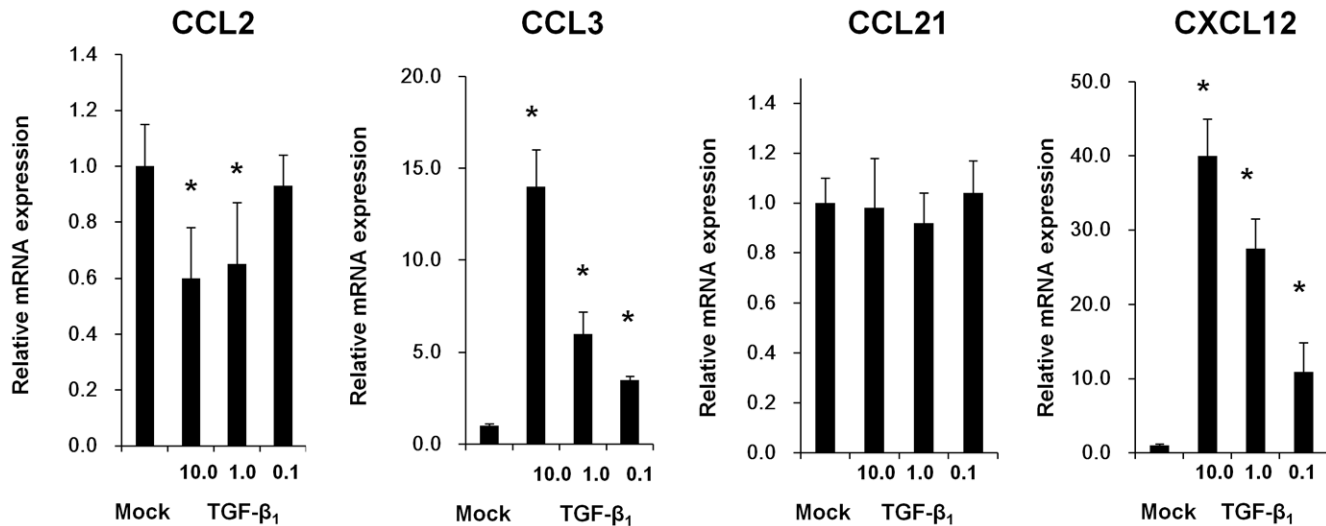

**Figure 2. Effect of TGF- $\beta_1$  on chemokine regulation of HK-2 cells.** HK-2 cells were stimulated with TGF- $\beta_1$  (10.0, 1.0 and 0.1 ng/ml) for 24 hrs. The expression changes of CCL3, CCL4, CCL17, CCL19, CCL20, CCL22 and CXCL12 were analyzed by real-time RT-PCR. CCL2 was down-regulated but CCL3 and CXCL12 were up-regulated on HK-2 cells by TGF- $\beta_1$  stimulation in a dose-dependent manner. CCL21 did not change on HK-2 cells by TGF- $\beta_1$  stimulation. Values are expressed as mean  $\pm$  SEM of at least three experiments. \* $P < 0.05$ . doi:10.1371/journal.pone.0023267.g002

activation on HK-2 cells. CXCL12 and CCL3 on HK-2 cells were knocked down by transfection of CXCL12-siRNA or CCL3-siRNA, respectively. Non-treated (Mock) HK-2 cells and non-targeted-siRNA-transfected (Control) HK-2 cells served as controls. CXCL12 knockdown (CXCL12 KD) HK-2 cells did not increase CXCL12 expression regardless of TGF- $\beta_1$  stimulation. CCL3 knockdown (HK-2-CCL3 KD) HK-2 cells did not increase CCL3 expression regardless of TGF- $\beta_1$  stimulation (Figure S1). PBMCs were co-cultured with CXCL12 KD, CCL3 KD, Control or Mock HK-2 cells after stimulation with TGF- $\beta_1$  (0.1 ng/ml) for 30 minutes. Significantly less AL57-positive cells were detected among PBMCs after co-culture with CXCL12KD HK-2 cells than among CCL3KD, Control and Mock HK-2 cells (Figure 3B).

#### Interaction of LFA-1 on PBMCs and ICAM-1 on HK-2 cells accelerated TGF- $\beta_1$ -induced EMT of HK-2 cells

We investigated the impact of the interaction of LFA-1 on PBMCs and ICAM-1 on HK-2 cells on the EMT of HK-2 cells. HK-2 cells after stimulation of TGF- $\beta_1$  (0.1 ng/ml) for 24 hrs were co-cultured with PBMCs for a further 24 hrs (HK-2-TGF- $\beta_1$  (0.1)-PBMCs). Then, the changes of epithelial cell junction markers and mesenchymal markers on HK-2-TGF- $\beta_1$  (0.1)-PBMCs were investigated by real-time RT-PCR and western blotting analysis. HK-2 cells after stimulation of TGF- $\beta_1$  (0.1 ng/ml) without co-culture with PBMCs (HK-2-TGF- $\beta_1$  (0.1)) and HK-2 cells without stimulation of TGF- $\beta_1$  co-cultured with PBMCs (HK-2-PBMCs) were investigated as control experiments. The results of real-time RT-PCR showed that the expression of epithelial cell junction markers (E-cadherin and occludin) further significantly decreased and that of mesenchymal markers (vimentin and fibronectin 1) further significantly increased in HK-2-TGF- $\beta_1$  (0.1)-PBMCs compared with those of controls. These EMT marker changes on HK-2-TGF- $\beta_1$  (0.1)-PBMCs were blocked by anti-LFA-1 mAb or anti-ICAM-1 mAb, whereas they were not blocked by isotype control mAb (Figure 4). Phase contrast microscopy analysis showed that HK-2-TGF- $\beta_1$  (0.1)-PBMCs changed more, morphologically, from a cobblestone-like monolayer to spindle-shaped fibroblast-like

cells, than the controls. These morphological changes of HK-2-TGF- $\beta_1$  (0.1)-PBMCs were mitigated by anti-LFA-1 mAb or anti-ICAM-1 mAb, whereas they were not mitigated by isotype control mAb (Figure 5 A–G). Western blot analysis showed that the expression of epithelial cell junction markers (E-cadherin and occludin) further significantly decreased and that of mesenchymal markers (vimentin and fibronectin) further significantly increased in HK-2-TGF- $\beta_1$  (0.1)-PBMCs compared with those of controls. These EMT marker changes on HK-2-TGF- $\beta_1$  (0.1)-PBMCs were blocked by anti-LFA-1 mAb or anti-ICAM-1 mAb, whereas they were not blocked by isotype control mAb (Figure 5 H).

#### The interaction of HK-2 cells pre-stimulated with TGF- $\beta_1$ and PBMCs up-regulated TGF- $\beta_1$ level in co-culture media

To investigate whether pre-stimulation of HK-2 cells by TGF- $\beta_1$  contributes to EMT or just induces the CXCL12 that activates LFA-1 on PBMCs, we employed a transwell co-culture system as described above. HK-2 cells without TGF- $\beta_1$  stimulation and PBMCs were co-cultured in a lower plate and HK-2 cells pre-stimulated by TGF- $\beta_1$  (10.0 ng/ml, 1.0 ng/ml and 0.1 ng/ml) were cultured in an upper insert. After 24 hrs of incubation, TGF- $\beta_1$  concentrations in the media in the lower wells were determined by TGF- $\beta_1$  ELISA. The concentrations of TGF- $\beta_1$  in the co-culture media of HK-2 cells and PBMCs in the lower wells were about threefold higher than those of HK-2 cells alone (Fig. 6).

#### The interaction of LFA-1 on PBMCs and ICAM-1 on HK-2 cells activated ERK 1/2 signaling on HK-2 cells

We investigated the phosphorylation of smad2, smad3 and ERK1/2 in HK-2-TGF- $\beta_1$  (0.1)-PBMCs to investigate the signaling pathways that might be involved in the acceleration of TGF- $\beta_1$ -induced EMT on HK-2 cells by PBMCs. The phosphorylation of smad2 and smad3 was not detected (data not shown); however, the phosphorylation of ERK1/2 was detected in HK-2-TGF- $\beta_1$  (0.1)-PBMCs at 4 hrs and 12 hrs after co-culture by western blot analysis (Figure 7). The phosphorylation of ERK1/2

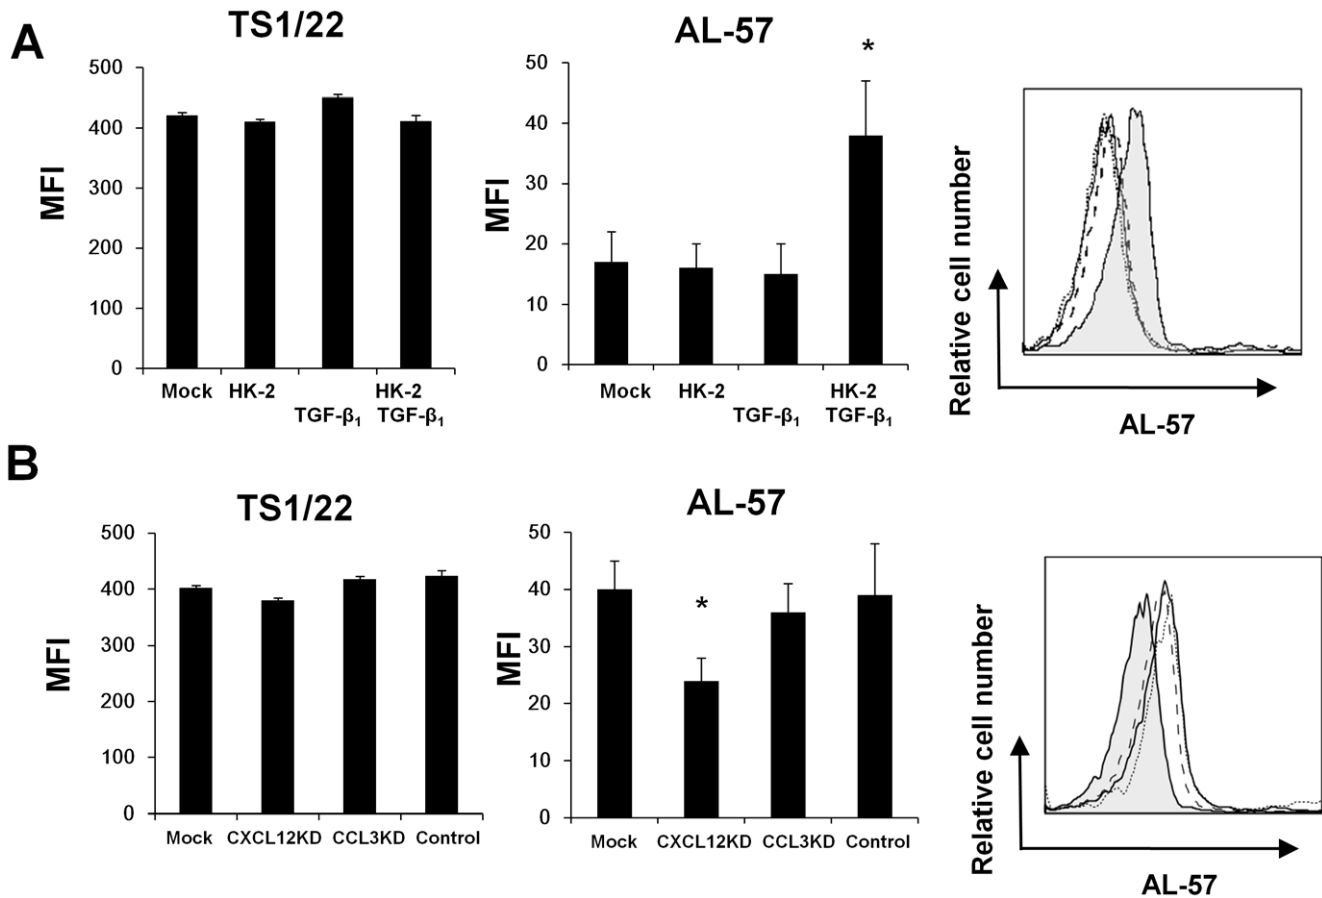

**Figure 3. Effect of HK-2 cells on LFA-1 activation on PBMCs.** PBMCs were grown alone (Mock), with HK-2 cells (HK-2), with TGF- $\beta_1$  (0.1 ng/ml) (TGF- $\beta_1$ ) or with HK-2 cells following TGF- $\beta_1$  stimulation (HK-2-TGF- $\beta_1$ ) for 30 minutes. Total LFA-1 on PBMCs and the active form of LFA-1 were stained with anti-LFA-1 mAb or the anti-active form of LFA-1 mAb. Closed histogram: AL57-stained PBMCs co-cultured with HK-2 cells following TGF- $\beta_1$  (0.1 ng/ml) stimulation. Solid line: AL57-stained PBMCs (Mock). Dashed line: AL57-stained PBMCs co-cultured with HK-2 cells. Dotted line: AL57-stained PBMCs stimulated with TGF- $\beta_1$  (0.1 ng/ml) alone. The graphs represent relative changes of total LFA-1 (TS1/22) and the active form of LFA-1 (AL-57) on HK-2 cells as mean  $\pm$  SEM of at least three experiments. \* $P < 0.05$ . MFI: mean fluorescence intensity (A). PBMCs were grown with non-treated HK-2 cells (Mock), CXCL12 knockdown HK-2 cells (CXCL12KD), CCL3 knockdown HK-2 cells (CCL3KD) or non-targeted-siRNA-transfected HK-2 cells (Control) following TGF- $\beta_1$  (0.1 ng/ml) stimulation for 30 minutes. Total LFA-1 on PBMCs and the active form of LFA-1 were stained with anti-LFA-1 mAb or the anti-active form of LFA-1 mAb. Cells were analyzed by flow cytometry. Closed histogram: AL57-stained PBMCs co-cultured with CXCL12 KD following TGF- $\beta_1$  (0.1 ng/ml) stimulation. Solid line: AL57-stained PBMCs co-cultured with Mock following TGF- $\beta_1$  (0.1 ng/ml) stimulation. Dashed line: AL57-stained PBMCs co-cultured with CCL3KD following TGF- $\beta_1$  (0.1 ng/ml) stimulation. Dotted line: AL57-stained PBMCs co-cultured with Control following TGF- $\beta_1$  (0.1 ng/ml) stimulation. Values are expressed as mean  $\pm$  SEM of at least three experiments. \* $P < 0.05$ . MFI: mean fluorescence intensity (B).

doi:10.1371/journal.pone.0023267.g003

was blocked by anti-LFA-1 mAb (clone: TS1/22; 10  $\mu$ g/ml) or anti-ICAM-1 mAb (clone: 6.5B5; 10  $\mu$ g/ml), whereas it was not blocked by isotype control mAb (Figure 7).

#### The interaction of PBMCs and HK-2 cells pre-stimulated with TGF- $\beta_1$ contributed to the part of EMT of HK-2 cells

We compared the role of the interaction of PBMCs and HK-2 cells pre-stimulated with TGF- $\beta_1$  and that of TGF- $\beta_1$  for EMT of HK-2 cells. The expression of snail and slug signaling and the expression of  $\alpha$ -SMA in HK-2-TGF- $\beta_1$  (0.1)-PBMC were investigated by real-time RT-PCR at 48 hrs, 72 hrs and 96 hrs after co-culture. HK-2 cells treated with TGF- $\beta_1$  (10.0 ng/ml) (HK-2-TGF- $\beta_1$  (10)) served as controls of TGF- $\beta_1$ -induced full EMT of HK-2 cells. Mock, HK-2-TGF- $\beta_1$  (0.1) and HK-2-PBMCs were investigated as control experiments. Although snail and slug signaling and  $\alpha$ -SMA expression significantly increased in HK-2-TGF- $\beta_1$  (10) at 48 hrs, 72 hrs and 96 hrs, they did not

increase in HK-2-TGF- $\beta_1$  (0.1)-PBMCs, HK-2-TGF- $\beta_1$  (0.1) and HK-2-PBMCs compared with those of Mock (Figure 8). Furthermore, we investigated the migration and invasion of HK-2-TGF- $\beta_1$  (0.1)-PBMC. Although the migration of HK-2-TGF- $\beta_1$  (10) significantly increased at 72 hrs and 96 hrs with a transient decrease at 48 hrs, that of HK-2-TGF- $\beta_1$  (0.1)-PBMCs did not change compared with those of Mock, HK-2-TGF- $\beta_1$  (0.1) and HK-2-PBMCs at 72 hrs and 96 hrs with a transient decrease at 48 hrs (Figure 9A). Although the invasion of HK-2-TGF- $\beta_1$  (10) increased at 96 hrs with a transient decrease at 48 hrs, that of HK-2-TGF- $\beta_1$  (0.1)-PBMC did not change compared with those of Mock, HK-2-TGF- $\beta_1$  (0.1) and HK-2-PBMCs at 48 hrs, 72 hrs and 96 hrs (Figure 9B).

#### Discussion

The present study showed that the TGF- $\beta_1$ -induced EMT on HK-2 cells was accelerated by PBMCs. The decrease of expression

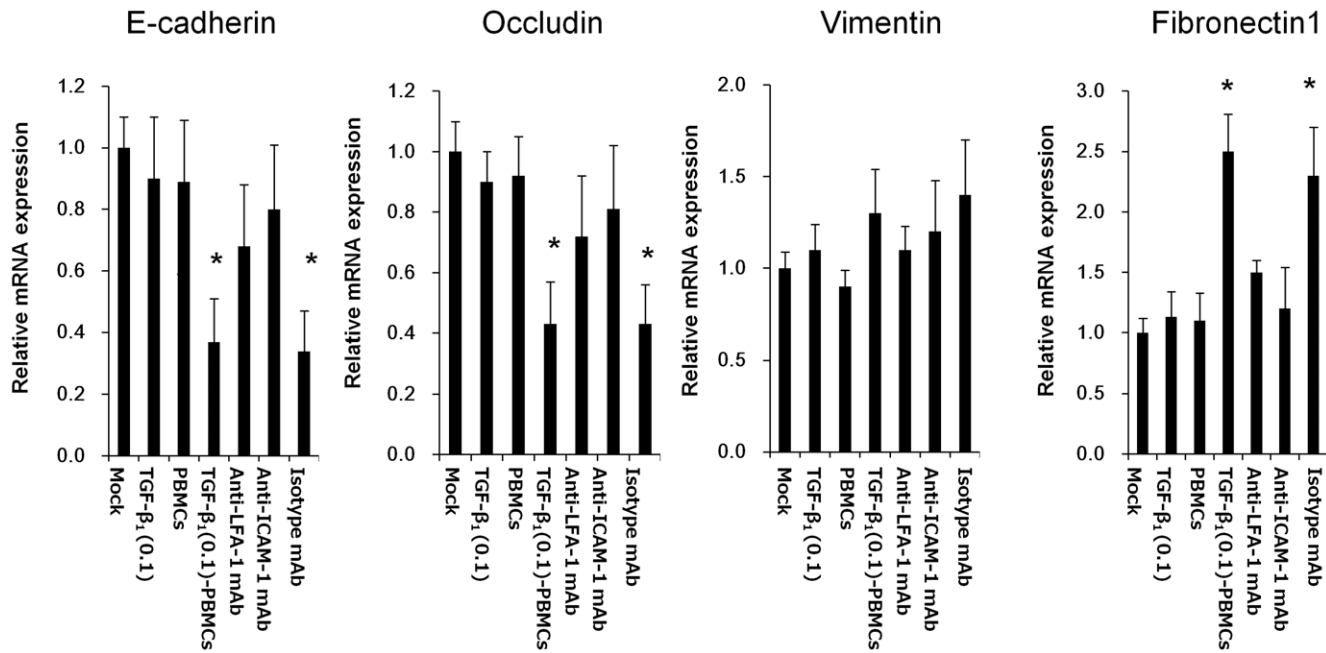

**Figure 4. Effect of PBMCs on EMT markers on HK-2 cells.** HK cells were co-cultured with PBMCs for 24 hrs following TGF- $\beta_1$  (0.1 ng/ml) stimulation for 24 hrs. Then, the changes of the epithelial markers (E-cadherin and occludin) and the mesenchymal markers (vimentin and fibronectin 1) on HK-2 cells (HK-2-TGF- $\beta_1$  (0.1)-PBMCs) were assessed by real-time RT-PCR. For blocking the interaction of LFA-1 and ICAM-1, before co-culture, PBMCs were pre-incubated with anti-LFA-1 mAb for 20 minutes (Anti-LFA-1 mAb) or HK-2 cells were pre-incubated with anti-ICAM-1 mAb for 20 minutes (Anti-ICAM-1 mAb) or isotype control mAb for 20 minutes (IsoType mAb). The changes of epithelial cell junction markers and mesenchymal markers on HK-2 cells without co-culture with PBMCs following TGF- $\beta_1$  (0.1 ng/ml) stimulation for 24 hrs (HK-2-TGF- $\beta_1$  (0.1)) and HK-2 cells without stimulation of TGF- $\beta_1$  co-cultured with PBMCs (HK-2-PBMCs) were investigated as controls. Values are expressed as mean  $\pm$  SEM of at least three experiments. \* $P < 0.05$ . doi:10.1371/journal.pone.0023267.g004

level of epithelial cell junction markers and increase of expression level of mesenchymal markers on HK-2 cells after stimulation of TGF- $\beta_1$  were accelerated by co-culture with PBMCs. These EMT marker changes on HK-2 cells were mitigated by anti-LFA-1 mAb or anti-ICAM-1 mAb. These results demonstrated that the direct interaction of LFA-1 on PBMCs and ICAM-1 on HK-2 cells contributed to accelerate TGF- $\beta_1$ -induced EMT on HK-2 cells. HK-2 cells stimulated by TGF- $\beta_1$  induced conformational activation of LFA-1 on PBMCs; however, HK-2 cells without stimulation by TGF- $\beta_1$  or TGF- $\beta_1$  alone did not induce conformational activation of LFA-1 on PBMCs. The locally secreted chemokines can trigger integrin-dependent adhesion of circulating leukocytes that leads to infiltration [19,20,21,22]. Several studies have characterized the expression pattern of chemokines in animal models of tubulointerstitial disease [23,24,25]. They demonstrated that various chemokines such as CCL2, CCL3, CCL4 and CCL5 are expressed only in the diseased compartment of the kidney and renal chemokine expression has been found to correlate with the leukocyte accumulation area and renal damage [23,24,25,26]. On the basis of these findings, we investigated the regulation of the chemokines that may mediate LFA-1 activation of PBMCs on HK-2 cells by the stimulation of TGF- $\beta_1$ . CCL2 decreased on HK-2 cells by stimulation of TGF- $\beta_1$ . This result was consistent with a previous study [27]. CCL3 and CXCL12 increased on HK-2 cells by TGF- $\beta_1$  stimulation. CCL21 did not change on HK-2 cells by TGF- $\beta_1$  stimulation. CCL3, CCL4, CCL17, CCL19, CCL20 and CCL22 were not detected on HK-2 cells either before or after TGF- $\beta_1$  stimulation. CCL3 and CXCL12 were reported to activate LFA-1 on both monocytes and lymphocytes [28,29,30,31,32]. In the present study, not CCL3 but CXCL 12 contributed to induction of the conformational activation of LFA-1

on PBMCs, because less AL57-positive cells were detected among PBMCs after co-culture with CXCL12 knockdown HK cells compared with those among Mock, CCL3 knockdown and control knockdown HK-2 cells pre-stimulated with TGF- $\beta_1$ . Furthermore, the EMT marker changes of HK-2 cells pre-stimulated with TGF- $\beta_1$  and morphological changes upon co-culture with PBMC were inhibited by CXCL12 knockdown on HK-2 cells (Figures S2 and S3). These results suggested that CXCL12 was a key chemokine for EMT of RTECs that induced TGF- $\beta_1$  accelerated by PBMCs.

Since TGF- $\beta_1$  is up-regulated in the fibrotic kidney and is the main inducer of EMT in RTECs [17,18], we determined TGF- $\beta_1$  concentration in the co-culture media of HK-2 cells and PBMCs with non-direct contacted culture with HK-2 cells pre-stimulated by TGF- $\beta_1$  using transwell plate to investigate whether pre-stimulation of HK-2 cells by TGF- $\beta_1$  contributes to EMT on RTECs or just induces the CXCL12 that activates LFA-1 on PBMCs. TGF- $\beta_1$  concentrations of the co-culture media of HK-2 cells and PBMCs were about threefold up-regulated compared with those of HK-2 cells without PBMCs. These results suggested that the pre-stimulation of HK-2 cells by TGF- $\beta_1$  contributes to increase not only chemokine production but also up-regulation of TGF- $\beta_1$  that induced EMT in RTECs upon the interaction of RTECs and PBMCs. We conducted real-time RT-PCR to detect the change of the *TGF- $\beta_1$  mRNA* in the HK-2 cells that underwent EMT and PBMCs in the lower plate separately at several time points after co-culture; however, we could not detect up-regulation of *TGF- $\beta_1$  mRNA* in both these HK-2 cells and PBMCs (data not shown). Although further study will be needed to investigate the regulation of TGF- $\beta_1$  on the interaction of LFA-1 on PBMCs and ICAM-1 on RTECs, the up-regulation of TGF- $\beta_1$  concentrations of the co-culture media of HK-2 cells and PBMCs also suggested

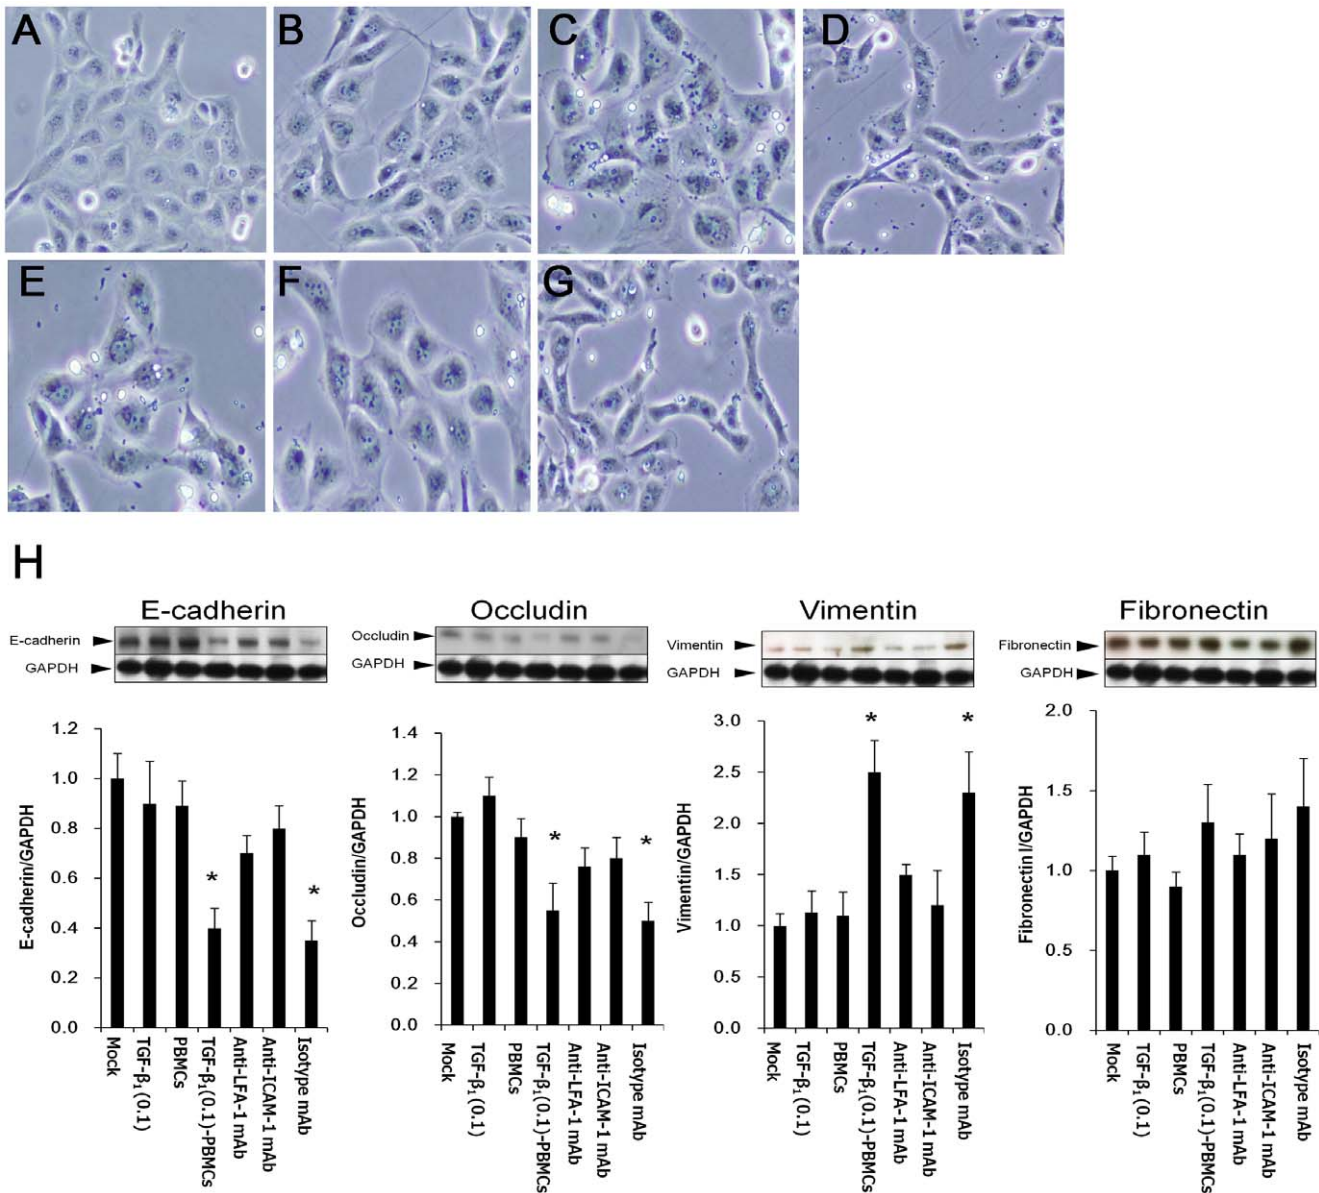

**Figure 5. Assessment of the effect of PBMCs on the morphology and EMT markers of HK-2 cells.** Non-treated HK-2 cells (A). HK-2 cells grown for 24 hrs following TGF- $\beta_1$  (0.1 ng/ml) stimulation for 24 hrs (B). HK-2 cells co-cultured with PBMCs for 24 hrs without TGF- $\beta_1$  stimulation (C). HK-2 cells co-cultured with PBMCs for 24 hrs following TGF- $\beta_1$  (0.1 ng/ml) stimulation (D). HK-2 cells co-cultured with PBMCs with pre-incubated anti-LFA-1 mAb following TGF- $\beta_1$  (0.1 ng/ml) stimulation for 24 hrs (E). HK-2 cells pre-incubated with anti-ICAM-1 mAb co-cultured with PBMCs following TGF- $\beta_1$  (0.1 ng/ml) stimulation for 24 hrs (F). HK-2 cells pre-incubated with isotype control mAb co-cultured with PBMCs following TGF- $\beta_1$  (0.1 ng/ml) stimulation for 24 hrs (G). Magnification 100 $\times$ . HK cells were co-cultured with PBMCs for 24 hrs following TGF- $\beta_1$  (0.1 ng/ml) stimulation for 24 hrs. Then, the changes of the epithelial markers (E-cadherin and occludin) and the mesenchymal markers (vimentin and fibronectin 1) on HK-2 cells (HK-2-TGF- $\beta_1$  (0.1)-PBMCs) were assessed by western blotting analysis (H). For blocking the interaction of LFA-1 and ICAM-1, before co-culture, PBMCs were pre-incubated with anti-LFA-1 mAb for 20 minutes (Anti-LFA-1 mAb) or HK-2 cells were pre-incubated with anti-ICAM-1 for 20 minutes (Anti-ICAM-1 mAb) or isotype control mAb for 20 minutes (Isotype mAb). HK-2 cells without co-culture with PBMCs following TGF- $\beta_1$  (0.1 ng/ml) stimulation for 24 hrs (TGF- $\beta_1$  (0.1)) and HK-2 cells without stimulation of TGF- $\beta_1$  co-cultured with PBMCs (PBMCs) were investigated as control. One representative immunoblot is presented at the top of the graph. Values are expressed as mean  $\pm$  SEM of at least three experiments. \*P<0.05. doi:10.1371/journal.pone.0023267.g005

the possibility of autocrine and self-sustained activation of TGF- $\beta_1$  on RTECs in the presence of PBMCs.

In the EMT of RTECs, smad2 and smad3 were mainly mediated by TGF- $\beta_1$  [33]. In the present study, the phosphorylation of smad2 and smad3 was not detected in HK-2 cells by the stimulation of TGF- $\beta_1$  for 24 hrs before and after co-culture with PBMCs. This lack of phosphorylation of smad2 and smad3 is considered to be due to the low concentration of TGF- $\beta_1$  (0.1 ng/

ml) because phosphorylation of smad2 and smad3 on HK-2 cells was detected after stimulation with higher concentrations of TGF- $\beta_1$  (10.0 ng/ml) for 24 hrs (data not shown). Xie et al. reported that the activation of ERK pathway was required for TGF- $\beta_1$ -induced EMT of RTECs [34]. Schramek et al. reported that long-term ERK1/2 activation was an important mechanism involved in the EMT of HK-2 cells [35,36]. In addition to the role of ICAM-1 as an adhesion molecule, ICAM-1 also has roles as a signal

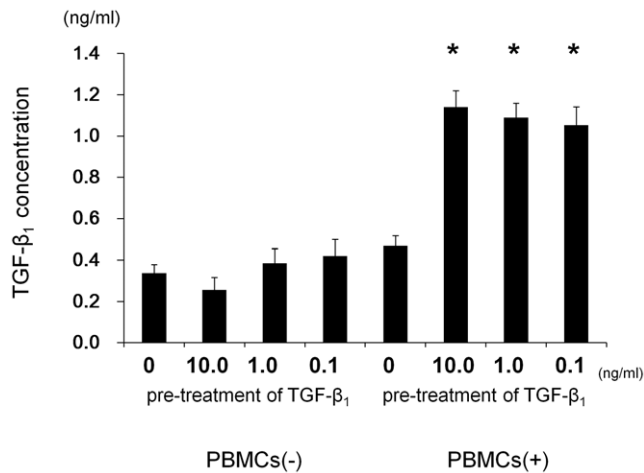

**Figure 6. The effect of the co-culture of HK-2 cells pre-stimulated with TGF-β<sub>1</sub> and PBMCs for TGF-β<sub>1</sub> level in culture media.** HK-2 cells without TGF-β<sub>1</sub> stimulation and PBMCs were co-cultured in lower plate and HK-2 cells with pre-stimulated TGF-β<sub>1</sub> (10.0 ng/ml, 1.0 ng/ml and 0.1 ng/ml) were cultured in upper insert in transwell plate. After 24 hrs of incubation, TGF-β<sub>1</sub> concentrations in the lower well media were determined by TGF-β<sub>1</sub> ELISA. Values are expressed as mean ± SEM of at least three experiments. \*P<0.05. doi:10.1371/journal.pone.0023267.g006

transduction molecule [37,38,39]. With the interaction of LFA-1 with ICAM-1 and the formation of ICAM-1 multimers within the cell membrane, signal transduction is initiated [40,41]. ICAM-1 with associated proteins such as Grb2, SOS and Shc can lead to downstream activation of the mitogen-activated protein (MAP) kinase pathway, including ERK1/2 [38,42]. The ERK1/2 proteins were most commonly activated through ICAM-1 ligation [38,40]. In the present study, phosphorylation of ERK1/2 was

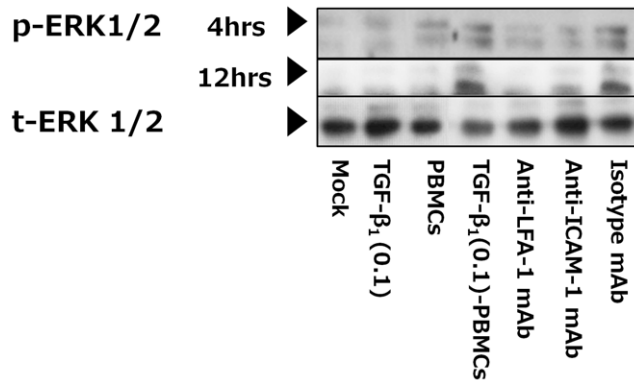

**Figure 7. The effect of PBMCs on the activation of extracellular regulated kinase 1 and 2 (ERK1/2) of HK-2 cells.** HK cells were co-cultured with PBMCs for 24 hrs following TGF-β<sub>1</sub> (0.1 ng/ml) stimulation for 24 hrs (TGF-β<sub>1</sub> (0.1)-PBMCs). After 4 and 12 hrs of co-culture with PBMCs, aliquots of HK-2 cell lysate were subjected to western blot analysis. For blocking the interaction of LFA-1 and ICAM-1, before co-culture, PBMCs were pre-incubated with anti-LFA-1 mAb for 20 minutes (Anti-LFA-1 mAbs) and HK-2 cells were pre-incubated with anti-ICAM-1 mAb for 20 minutes (Anti-ICAM-1 mAbs) or isotype control mAb for 20 minutes (Isotype mAb). HK-2 cells without co-culture with PBMCs following TGF-β<sub>1</sub> (0.1 ng/ml) stimulation for 24 hrs (TGF-β<sub>1</sub>(0.1)) and HK-2 cells without stimulation of TGF-β<sub>1</sub> co-cultured with PBMCs (PBMCs) were investigated as controls. One representative immunoblot is presented at the top of the graph. doi:10.1371/journal.pone.0023267.g007

detected on HK-2 cells after stimulation of TGF-β<sub>1</sub> co-cultured with PBMCs. This phosphorylation of ERK1/2 was blocked by anti-LFA-1 mAb or anti-ICAM-1 mAb. These results suggested that ERK 1/2 may be activated through ICAM-1 on HK-2 cells by the interaction of ICAM-1 on HK-2 cells and LFA-1 on PBMCs. LFA-1 also acts as a signal transduction molecule when it binds ligands [7]. Although ICAM-1 expression still showed a high level in HK-2 cells by TGF-β<sub>1</sub> stimulation, its suppression by TGF-β<sub>1</sub> might be an inhibition factor for EMT of HK-2 cells by the interaction of ICAM-1 of HK-2 cells and LFA-1 of PBMCs. Further study will be needed to investigate the mechanism and significance of the regulation of ICAM-1 expression, the signaling pathway that affects EMT of HK-2 cells on PBMCs by the interaction of LFA-1 on PBMCs and ICAM-1 on HK-2 cells.

Next, we characterized the EMT of HK-2-TGF-β<sub>1</sub> (0.1)-PBMCs compared with full EMT of HK-2 induced by TGF-β<sub>1</sub> (HK-2-TGF-β<sub>1</sub> (10)). Although snail and slug signaling and α-SMA expression significantly increased in HK-2-TGF-β<sub>1</sub> (10), they did not increase in HK-2-TGF-β<sub>1</sub> (0.1)-PBMCs at 48 hrs, 72 hrs and 96 hrs, the same as HK-2-PBMCs and HK-2-TGF-β<sub>1</sub> (0.1). Furthermore, the migration of HK-2-TGF-β<sub>1</sub> (10) significantly increased at 72 hrs and 96 hrs with a transient decrease at 48 hrs; however, that of HK-2-TGF-β<sub>1</sub> (0.1)-PBMCs did not change compared with those of Mock, HK-2-TGF-β<sub>1</sub> (0.1) and HK-2-PBMCs at 72 hrs and 96 hrs with a transient decrease at 48 hrs. Although the invasion of HK-2-TGF-β<sub>1</sub> (10) also increased at 96 hrs with a transient decrease at 48 hrs, that of HK-2-TGF-β<sub>1</sub> (0.1)-PBMC did not change compared with those of Mock, HK-2-TGF-β<sub>1</sub> (0.1) and HK-2-PBMCs at 48 hrs, 72 hrs and 96 hrs. These results suggested that TGF-β<sub>1</sub> (0.1) is not sufficient to induce EMT of RTECs and the interaction of LFA-1 of PBMCs and ICAM-1 of RTECs pre-stimulated with TGF-β<sub>1</sub> (0.1) contributed to the early part of EMT of RTECs. Taking these findings together, the low level of TGF-β<sub>1</sub> that could not induce EMT of RTECs by itself may contribute to EMT of RTECs by inducing the interaction of ICAM-1 of RTECs and LFA-1 on PBMCs, leading to activation of the signaling through ICAM-1 and self-sustained activation of TGF-β<sub>1</sub> on RTECs.

The extent to which EMT contributes to renal fibrosis remains to be clarified; however, evidence for the role of EMT in renal fibrosis in various renal diseases is emerging. A large proportion of the interstitial fibroblasts in fibrotic kidneys have been reported to originate from proximal tubular cells in an animal model [16]. Clinical studies utilizing human kidney biopsies also suggest that EMT plays a role in the pathogenesis of renal fibrosis [43,44,45]. Furthermore, EMT of RTECs was well correlated with declining renal function [43,45]. The renal fibrosis also involved interstitial infiltration of inflammatory mononuclear leukocytes [3]. Thus, our finding suggested that inflammatory mononuclear leukocytes contributed to renal fibrosis by accelerating EMT of RTECs.

In conclusion, HK-2 cells stimulated with TGF-β<sub>1</sub> induced activation of LFA-1 on PBMCs by increased CXCL12. The direct interaction of LFA-1 on PBMCs and ICAM-1 on HK-2 cells activated ERK1/2 signaling to accelerate the part of EMT of HK-2 cells induced by TGF-β<sub>1</sub>. These results suggested that drugs that can block the interaction of LFA-1 and ICAM-1 could be an option to treat renal fibrosis.

## Materials and Methods

### Cell culture

HK-2 cells (human renal proximal tubular epithelial cells immortalized by transduction with human papilloma virus 16 E6/E7 genes) were purchased from American Type Culture

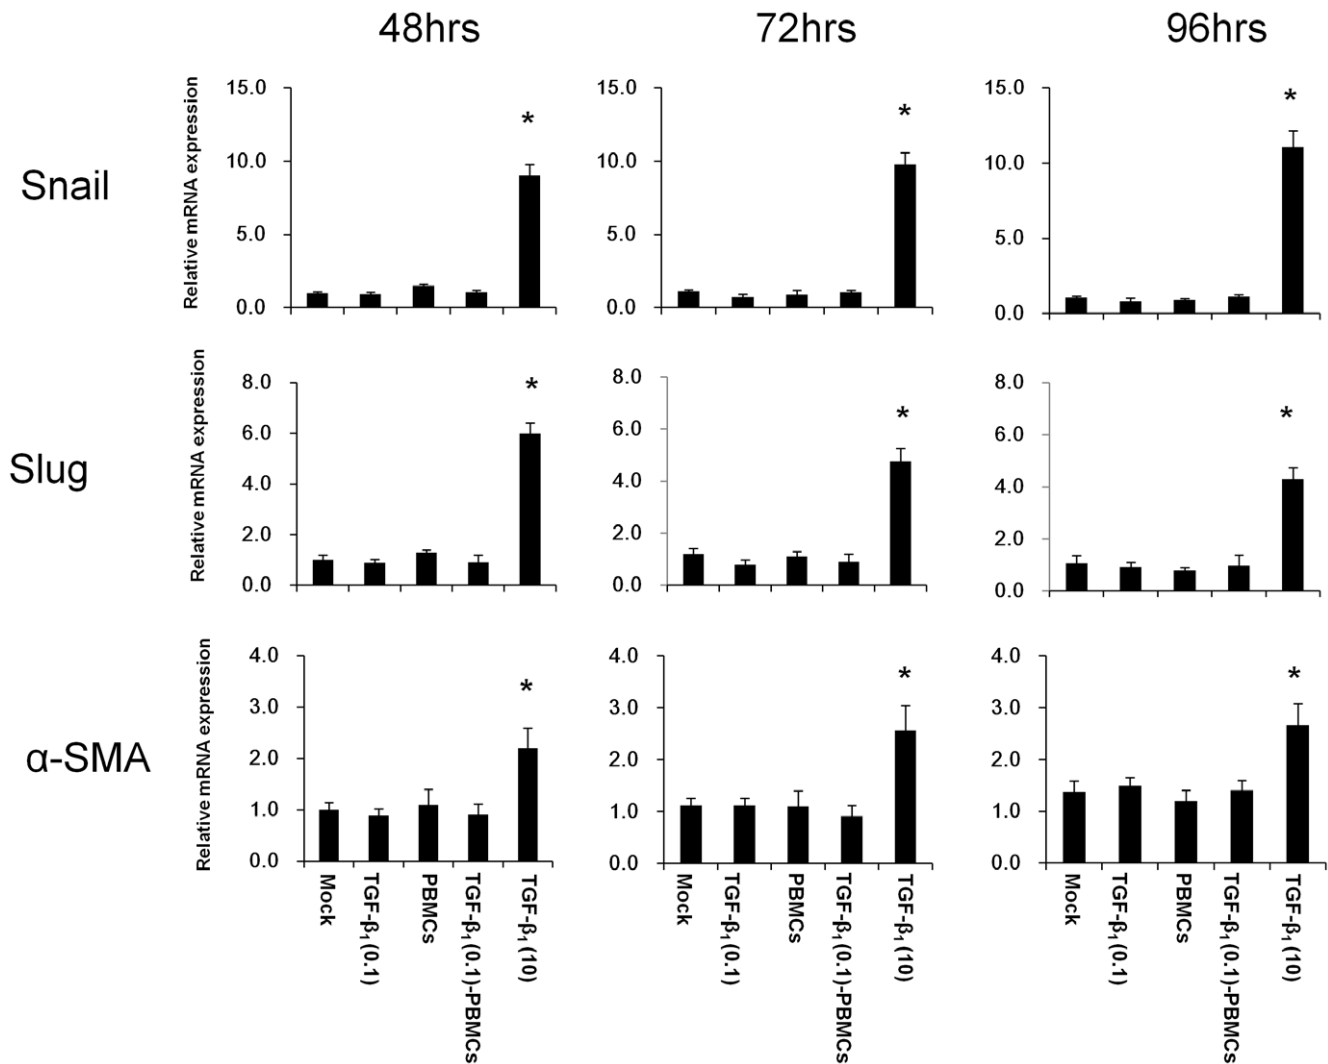

**Figure 8. The effect of interaction of HK-2 cells pre-stimulated with TGF- $\beta_1$  and PBMCs for snail and slug signaling and  $\alpha$ -smooth muscle actin expression on HK-2 cells.** The expressions of snail and slug signaling and  $\alpha$ -smooth muscle actin ( $\alpha$ -SMA) in the HK-2 cells pre-stimulated with TGF- $\beta_1$  (0.1 ng/ml) followed by co-culture with PBMCs (TGF- $\beta_1$  (0.1)-PBMC) for 48 hrs, 72 hrs and 96 hrs were determined by real-time RT-PCR. Non-treated HK-2 cells (Mock), HK-2 cells treated with TGF- $\beta_1$  (0.1 ng/ml) (TGF- $\beta_1$  (0.1)), HK-2 cells without TGF- $\beta_1$  treatment with co-cultured with PBMCs (PBMCs) and HK-2 cells treated with TGF- $\beta_1$  at 10 ng/ml (TGF- $\beta_1$  (10)) served as controls. Values are expressed as mean  $\pm$  SEM of at least three experiments. \* $P < 0.05$ .

doi:10.1371/journal.pone.0023267.g008

Collection (Manassas, VA). HK-2 cells were cultured in RPMI 1640 (Sigma-Aldrich, St. Louis, MO) supplemented with 10% fetal bovine serum (FBS) (Invitrogen, Grand Island, NY) and 1% penicillin and streptomycin (Invitrogen). PBMCs were obtained from three healthy donors, after obtaining informed consent, using Ficoll-gradient sedimentation. PBMCs were cultured with RPMI 1640 (Sigma-Aldrich) supplemented with 10% FBS (Invitrogen) and 1% penicillin and streptomycin (Invitrogen).

#### Treatments

The sub-confluent cultures of HK-2 cells in 6-well plate (Falcon, Franklin Lake, NJ) were treated with recombinant human TGF- $\beta_1$  (R&D Systems, Minneapolis, MN, USA) at concentrations of 10.0, 1.0 and 0.1 ng/ml for 24 hrs. Next, the cells were washed three times with phosphate-buffered saline (PBS). Then, PBMCs ( $2 \times 10^5$ ) were added to each well for co-culture for 24 hrs. For blocking the interaction of LFA-1 on PBMCs and ICAM-1 on

HK-2 cells, HK-2 cells were pre-incubated for 20 minutes at 37°C with 20  $\mu$ g/ml anti-ICAM-1 monoclonal antibody (mAb) (clone: 6.5B5, Santa Cruz Biotechnology Inc., Santa Cruz, CA) or naïve PBMCs were pre-incubated for 20 minutes at 37°C with  $\mu$ g/ml anti-LFA-1 mAb (clone TS1/22, kindly provided by Dr. M. Shimaoka, IDI Harvard Medical School, Boston) before co-culture. Pre-incubation with HK-2 and PBMCs with mouse IgG<sub>1</sub> isotype control mAb (clone MOPC-31C, BD, San Jose, CA) was used for control experiments.

#### Real-time RT-PCR

Total RNA from cells was isolated with RNeasy total RNA isolation kit (Qiagen, Valencia, CA). The isolated 1  $\mu$ g of total RNA was reverse-transcribed using Superscript III first-strand synthesis system (Invitrogen) according to the manufacturer's protocol. Real-time RT-PCR was performed using SYBR Green ER qPCR super mix (Invitrogen) and an Applied Biosystems Step



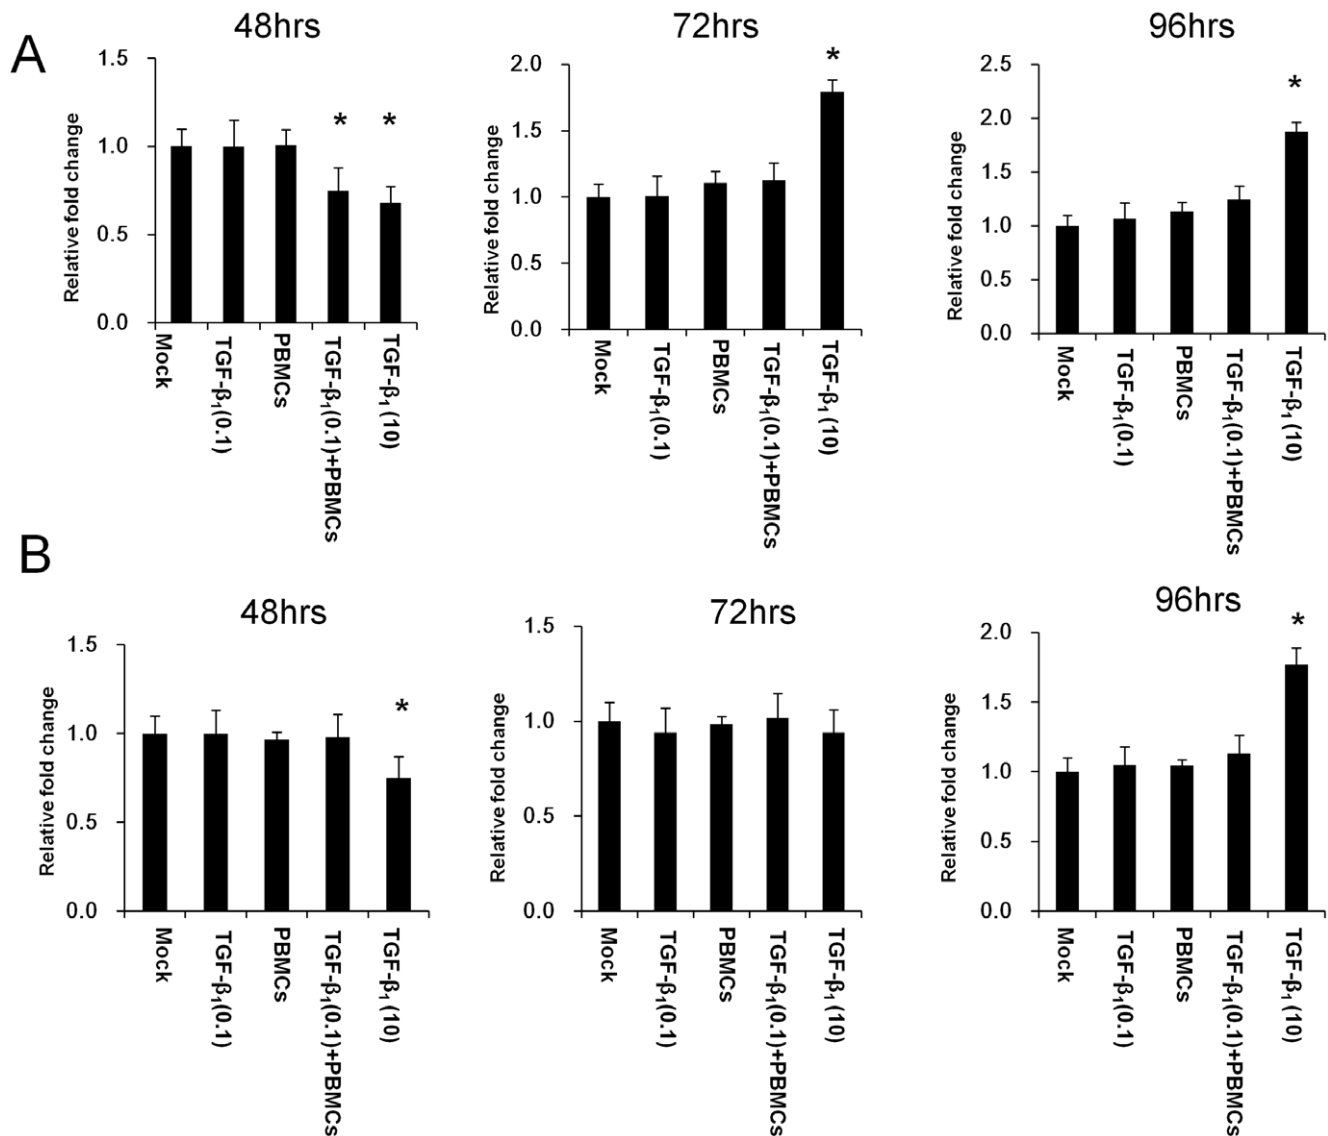

**Figure 9. The effect of interaction of HK-2 cells pre-stimulated with TGF- $\beta_1$  and PBMCS for the migration and invasion of HK-2 cells.** The migration (A) and invasion (B) of HK-2 cells pre-stimulated with TGF- $\beta_1$  (0.1 ng/ml) for 24 hrs followed by co-culture with PBMCS (TGF- $\beta_1$  (0.1)-PBMCS) for 48 hrs, 72 hrs and 96 hrs were investigated by transwell assay. Non-treated HK-2 cells (Mock), HK-2 cells stimulated with TGF- $\beta_1$  (0.1 ng/ml) (TGF- $\beta_1$  (0.1)), HK-2 cells without TGF- $\beta_1$  stimulation co-cultured with PBMCS, (PBMCS) and HK-2 cells stimulated with TGF- $\beta_1$  at 10 ng/ml (TGF- $\beta_1$  (10)) served as controls. Values are expressed as mean  $\pm$  SEM of at least three experiments. \* $P < 0.05$ . doi:10.1371/journal.pone.0023267.g009

One Plus Real-Time PCR system (Applied Biosystems, Carlsbad, CA). All reactions were carried out in a 20  $\mu$ l reaction volume in triplicate. Primers for human GAPDH, E-cadherin, occludin, vimentin, fibronectin 1,  $\alpha$ -smooth muscle actin, snail, slug, CCL2, CCL3, CCL4, CCL5, CCL17, CCL19, CCL20, CCL21, CCL22 and CXCL12 were as previously described [46,47,48,49,50, 51,52,53, Lin, 2009 #23, Hotz, 2007 #125].

#### Flow cytometry

Cells were stained with specific mAbs and analyzed using a BD-LSR flow cytometer (BD). The antibodies used were anti-ICAM-1 mAb (clone 15.2, Abcam, Cambridge, MA), anti-LFA-1 mAb, anti-active form LFA-1 mAb that reacts only with the active conformational form of LFA-1 but does not react with the non-active conformational form (clone AK-57, kindly provided by Dr. M. Shimaoka, IDI, Harvard Medical School, Boston) [54], mouse

IgG<sub>1</sub> isotype control mAb (clone MOPC-31C, BD), PE-conjugated goat anti-mouse immunoglobulin-specific antibody (BD) and PE-conjugated F(ab')<sub>2</sub> fragment anti-human IgG (H+L) (Jackson Immuno Research, West Grove, PA).

#### Western blot analysis

For western blotting, cells were extracted with lysis buffer [20 mM Tris-HCl (pH 7.4), 1% Triton, 10% glycerol and 0.1 mM phenylmethylsulfonyl fluoride] and phosphatase inhibitors (2 mM sodium fluoride, 2 mM sodium pyrophosphate, 1 mM sodium orthovanadate). Equal amounts of protein samples (40  $\mu$ g) were electrophoresed on NuPAGE sodium dodecyl sulphate-polyacrylamide gels (Invitrogen), and then transferred onto Immobilon-P membranes (Millipore Corporation, Bedford). After nonspecific protein binding was blocked with skim milk and bovine serum albumin, the membrane was incubated overnight at

4°C with an appropriate dilution of the primary antibody [1:2000 anti-E-cadherin mAb (clone 36/E-cadherin, BD), 1:500 anti-occludin mAbs (clone 19/occludin, BD), 1:2000 anti-vimentin mAbs (clone RV202, BD), 1:1000 anti-fibronectin mAbs (10/fibronectin, BD), 1:5000 anti-GAPDH polyclonal antibody (Santa Cruz Biotechnology), 1:2000 anti-smad3 mAb (Cell Signaling Technology, Danvers, MA, USA), 1:2000 anti-phospho-smad3 mAb (Cell Signaling Technology), 1:2000 anti-smad2 mAb (Cell Signaling Technology), 1:2000 anti-phospho-smad2 mAb (Cell Signaling Technology), 1:2000 anti-ERK1/2 mAb (Cell Signaling Technology) and 1:2000 anti-phospho-ERK1/2 mAb (Cell Signaling Technology)]. After washing, the membrane was incubated for 1 hr at room temperature with secondary antibody [horseradish peroxidase-conjugated sheep anti-mouse immunoglobulin (GE Healthcare, Piscataway, NJ) or horseradish peroxidase-conjugated donkey anti-rabbit immunoglobulin (GE Healthcare)]. The antibody complexes were visualized using the Amersham ECL detection system (GE Healthcare) as directed by the manufacturer.

### Transfection

Transfections were performed using Lipofectamine 2000 (Invitrogen) according to the manufacturer's instructions. The CXCL12-siRNA and CXCL3-siRNA were purchased from Sigma-Aldrich Japan (Ishikari Hokkaido). The sequences of siRNA are as follows.

CCL3: 5'-AAGCGAAGCCGGCAGGUCUTT-3' (sense)  
5'-AGACCUGCCGGCUUCGCUUTT-3' (antisense)  
CXCL12: 5'-CAUUAUUGUACUUGCCUUATT-3' (sense)  
5'-UAAGGCAAGUACAAUAAU-3' (antisense)

### TGF- $\beta_1$ ELISA

TGF- $\beta_1$  ELISA kit specific for human TGF- $\beta_1$  (TGF- $\beta_1$  ELISA, IBL, Flughafenstrasse, Hamburg) was used according to the manufacturer's protocol. Briefly, 100  $\mu$ l of samples was added to the TGF- $\beta_1$  mAb pre-coated plate and incubated overnight at 4°C. After washing, 100  $\mu$ l of antiserum was added and incubated for 2 hours at room temperature for blocking. After washing, anti-mouse IgG antibody conjugated to biotin was added and incubated for 45 minutes at room temperature. The color was developed with 100  $\mu$ l of streptavidin peroxidase and substrate.

### Cell migration and invasion assay

Cytoselect 24-well cell migration assay kit (Cell Biolabs, Inc., San Diego, CA) and Cytoselect 24-well cell invasion assay kit (Cell Biolabs, Inc.) were used according to the manufacturer's protocol. Briefly, 500  $\mu$ l of RPMI 1640 supplemented with 10% FBS was added to each well of the plate. Then, 300  $\mu$ l of cell suspension containing  $3 \times 10^5$  cells/ml or  $1.5 \times 10^6$  cells/ml was added to the 8  $\mu$ m pore size polycarbonate membrane cell culture inserts for cell migration assay or to the 8  $\mu$ m pore size polycarbonate membrane cell culture inserts coated with a uniform layer of basement membrane matrix solution for cell invasion assay, respectively. Then, cells were incubated for 24 hrs at 37°C in a 5% CO<sub>2</sub> atmosphere. Next, the medium was removed from the inside of the insert and the interior of the insert was gently swabbed with the wet end of cotton-tipped swabs to remove non-migratory cells. Then, each insert was transferred to a clean well containing 400  $\mu$ l of cell stain solution and incubated for 10 minutes at room temperature. After washing, inserts were transferred to an empty well and 200  $\mu$ l of extraction solution was added and incubated for 10 minutes. Then, the optical density (OD) was measured at 560 nm.

### Transwell co-culture system

Cytoselect 24-well cell migration assay kit (Cell Biolabs, Inc.) was used. HK cells without TGF- $\beta_1$  treatment with/without PBMCs were co-cultured in the lower well with complete media and HK-2 cells pre-stimulated with TGF- $\beta_1$  (10.0, 1.0 and 0.1 ng/ml) for 24 hrs followed by three careful washes by PBS or HK-2 cells without TGF- $\beta_1$  stimulation were added to 2  $\mu$ m pore size polycarbonate membrane cell culture inserts. Then, after 24 hrs of incubation, TGF- $\beta_1$  concentration in the lower well media was measured by TGF- $\beta_1$  ELISA.

### Statistical analysis

Statistical significance was evaluated by Student's t-test or by one-way analysis of variance followed by Fisher's PLSD test. Statistical significance was defined as  $P < 0.05$ . All values are expressed as means  $\pm$  SE.

### Supporting Information

**Figure S1 The change of CCL3 and CXCL12 expression in CCL3 and CXCL12 knockdown HK-2 cells by TGF- $\beta_1$  stimulation.** CCL3 knockdown HK-2 cells (CCL3 KD) and CXCL12 knockdown HK-2 cells (CXCL12 KD) were induced by transfection of CCL3 siRNA or CXCL12 siRNA, respectively. Then, CCL3 KD and CXCL12 KD HK-2 cells were stimulated with TGF- $\beta_1$  (10.0, 1.0 and 0.1 ng/ml) for 24 hrs. Non-treated HK-2 cells (Mock) and non-targeted-siRNA-transfected HK-2 cells (Control) served as controls. The expressions of CCL3 and CXCL12 were analyzed by real-time RT-PCR. CCL3 was up-regulated for CXCL12 KD, Mock and Control; however, it was not up-regulated for CCL3KD (upper graph) regardless of TGF- $\beta_1$  stimulation. CXCL12 was up-regulated for CCL3 KD, Mock and Control; however, it was not up-regulated for CXCL12 KD (lower graph). Values are expressed as mean  $\pm$  SEM of at least three experiments. \* $P < 0.05$ . (TIF)

**Figure S2 Effects of CCL3 and CXCL12 of HK-2 cells on the change of EMT markers on HK-2 cells by PBMCs.** PBMCs were co-cultured with non-treated HK-2 cells (Mock), CXCL12 knockdown HK-2 cells (CXCL12 KD), CCL3 knockdown HK-2 cells (CCL3 KD) or non-targeted-siRNA-transfected HK-2 cells (Control) for 24 hrs following TGF- $\beta_1$  (0.1 ng/ml) stimulation for 24 hrs. Then, the changes of the epithelial markers (E-cadherin and occludin) and the mesenchymal markers (vimentin and fibronectin 1) on those HK-2 cells were assessed by real-time RT-PCR. The expression of epithelial cell junction markers (E-cadherin and occludin) decreased and that of mesenchymal markers (vimentin and fibronectin 1) increased in Mock, CCL3 KD and Control, whereas these changes were significantly decreased in CXCL12 KD. Values are expressed as mean  $\pm$  SEM of at least three experiments. \* $P < 0.05$ . (TIF)

**Figure S3 Assessment of the effect of CCL3 and CXCL12 of HK-2 cells for morphology and EMT marker change by PBMCs.** PBMCs were co-cultured with non-treated HK-2 cells (Mock), CXCL12 knockdown HK-2 cells (CXCL12 KD), CCL3 knockdown HK-2 cells (CCL3 KD) or non-targeted-siRNA-transfected HK-2 cells (Control) for 24 hrs following TGF- $\beta_1$  (0.1 ng/ml) stimulation for 24 hrs. The cells were fluorescence-labeled by CM-Dil. Then, the cell morphology was observed using a fluorescent microscope. Magnification 100 $\times$ . The phase contrast microscopy analysis showed that CXCL12 KD (C,D) changed less, morphologically, from a cobblestone-like

monolayer to spindle-shaped fibroblast-like cells, than Mock (A,B), CCL3KD (E, F) and Control (G,H). Western blot analysis showed that the expression of epithelial cell junction markers (E-cadherin and occludin) decreased and that of mesenchymal markers (vimentin and fibronectin) increased in mock, CCL3KD and Control HK-2 cells, whereas these changes significantly decreased in CXCL12KD HK-2 cells (I). Values are expressed as mean  $\pm$  SEM of at least three experiments. \* $P < 0.05$ . (TIF)

## References

- Nath KA (1992) Tubulointerstitial changes as a major determinant in the progression of renal damage. *Am J Kidney Dis* 20: 1–17.
- Becker GJ, Hewitson TD (2000) The role of tubulointerstitial injury in chronic renal failure. *Curr Opin Nephrol Hypertens* 9: 133–138.
- Hooke DH, Gee DC, Atkins RC (1987) Leukocyte analysis using monoclonal antibodies in human glomerulonephritis. *Kidney Int* 31: 964–972.
- Lu C, Shimaoka M, Salas A, Springer TA (2004) The binding sites for competitive antagonistic, allosteric antagonistic, and agonistic antibodies to the I domain of integrin LFA-1. *J Immunol* 173: 3972–3978.
- Gahmberg CG, Tolvanen M, Kotovuori P (1997) Leukocyte adhesion—structure and function of human leukocyte beta2-integrins and their cellular ligands. *Eur J Biochem* 245: 215–232.
- Shimizu Y, van Seventer GA, Horgan KJ, Shaw S (1990) Roles of adhesion molecules in T-cell recognition: fundamental similarities between four integrins on resting human T cells (LFA-1, VLA-4, VLA-5, VLA-6) in expression, binding, and costimulation. *Immunol Rev* 114: 109–143.
- Van Seventer GA, Shimizu Y, Horgan KJ, Shaw S (1990) The LFA-1 ligand ICAM-1 provides an important costimulatory signal for T cell receptor-mediated activation of resting T cells. *J Immunol* 144: 4579–4586.
- Carman CV, Springer TA (2003) Integrin avidity regulation: are changes in affinity and conformation underemphasized? *Curr Opin Cell Biol* 15: 547–556.
- Kinashi T, Katagiri K (2004) Regulation of lymphocyte adhesion and migration by the small GTPase Rap1 and its effector molecule, RAPL. *Immunol Lett* 93: 1–5.
- Tomino Y, Ohmuro H, Kuramoto T, Shirato I, Eguchi K, et al. (1994) Expression of intercellular adhesion molecule-1 and infiltration of lymphocytes in glomeruli of patients with IgA nephropathy. *Nephron* 67: 302–307.
- Muller GA, Markovic-Lipkovski J, Muller CA (1991) Intercellular adhesion molecule-1 expression in human kidneys with glomerulonephritis. *Clin Nephrol* 36: 203–208.
- Azuma H, Nadeau K, Takada M, Mackenzie HS, Tilney NL (1997) Cellular and molecular predictors of chronic renal dysfunction after initial ischemia/reperfusion injury of a single kidney. *Transplantation* 64: 190–197.
- Kelly KJ, Williams WW Jr., Colvin RB, Bonventre JV (1994) Antibody to intercellular adhesion molecule 1 protects the kidney against ischemic injury. *Proc Natl Acad Sci U S A* 91: 812–816.
- Thiery JP, Sleeman JP (2006) Complex networks orchestrate epithelial-mesenchymal transitions. *Nat Rev Mol Cell Biol* 7: 131–142.
- Zeisberg M, Kalluri R (2004) The role of epithelial-to-mesenchymal transition in renal fibrosis. *J Mol Med* 82: 175–181.
- Iwano M, Plieth D, Danoff TM, Xue C, Okada H, et al. (2002) Evidence that fibroblasts derive from epithelium during tissue fibrosis. *J Clin Invest* 110: 341–350.
- Kopp JB, Factor VM, Mozes M, Nagy P, Sanderson N, et al. (1996) Transgenic mice with increased plasma levels of TGF-beta 1 develop progressive renal disease. *Lab Invest* 74: 991–1003.
- Kaneto H, Morrissey J, Klahr S (1993) Increased expression of TGF-beta 1 mRNA in the obstructed kidney of rats with unilateral ureteral ligation. *Kidney Int* 44: 313–321.
- Buyon JP, Abramson SB, Philips MR, Slade SG, Ross GD, et al. (1988) Dissociation between increased surface expression of gp165/95 and homotypic neutrophil aggregation. *J Immunol* 140: 3156–3160.
- Bargatzte RF, Butcher EC (1993) Rapid G protein-regulated activation event involved in lymphocyte binding to high endothelial venules. *J Exp Med* 178: 367–372.
- Dwinell MB, Ogawa H, Barrett KE, Kagnoff MF (2004) SDF-1/CXCL12 regulates cAMP production and ion transport in intestinal epithelial cells via CXCR4. *Am J Physiol Gastrointest Liver Physiol* 286: G844–850.
- Tanaka Y, Adams DH, Hubscher S, Hirano H, Siebenlist U, et al. (1993) T-cell adhesion induced by proteoglycan-immobilized cytokine MIP-1 beta. *Nature* 361: 79–82.
- Tang WW, Feng L, Mathison JC, Wilson CB (1994) Cytokine expression, upregulation of intercellular adhesion molecule-1, and leukocyte infiltration in experimental tubulointerstitial nephritis. *Lab Invest* 70: 631–638.
- Ou ZL, Natori Y (1999) Gene expression of CC chemokines in experimental acute tubulointerstitial nephritis. *J Lab Clin Med* 133: 41–47.
- Segerer S, Nelson PJ, Schlondorff D (2000) Chemokines, chemokine receptors, and renal disease: from basic science to pathophysiologic and therapeutic studies. *J Am Soc Nephrol* 11: 152–176.
- Haberstroh U, Stilo K, Pockock J, Wolf G, Helmchen U, et al. (1998) L-arginine suppresses lipopolysaccharide-induced expression of RANTES in glomeruli. *J Am Soc Nephrol* 9: 203–210.
- Gerritsma JS, van Kooten C, Gerritsen AF, van Es LA, Daha MR (1998) Transforming growth factor-beta 1 regulates chemokine and complement production by human proximal tubular epithelial cells. *Kidney Int* 53: 609–616.
- Weber C, Alon R, Moser B, Springer TA (1996) Sequential regulation of alpha 4 beta 1 and alpha 5 beta 1 integrin avidity by CC chemokines in monocytes: implications for transendothelial chemotaxis. *J Cell Biol* 134: 1063–1073.
- Chan JR, Hyduk SJ, Cybulsky MI (2001) Chemoattractants induce a rapid and transient upregulation of monocyte alpha4 integrin affinity for vascular cell adhesion molecule 1 which mediates arrest: an early step in the process of emigration. *J Exp Med* 193: 1149–1158.
- Lloyd AR, Oppenheim JJ, Kelvin DJ, Taub DD (1996) Chemokines regulate T cell adherence to recombinant adhesion molecules and extracellular matrix proteins. *J Immunol* 156: 932–938.
- Soede RD, Zeelenberg IS, Wijnands YM, Kamp M, Roos E (2001) Stromal cell-derived factor-1-induced LFA-1 activation during in vivo migration of T cell hybridoma cells requires Gq/11, RhoA, and myosin, as well as Gi and Cdc42. *J Immunol* 166: 4293–4301.
- Peled A, Kollet O, Ponomarev T, Petit I, Franitza S, et al. (2000) The chemokine SDF-1 activates the integrins LFA-1, VLA-4, and VLA-5 on immature human CD34(+) cells: role in transendothelial/stromal migration and engraftment of NOD/SCID mice. *Blood* 95: 3289–3296.
- Phanish MK, Wahab NA, Colville-Nash P, Hendry BM, Dockrell ME (2006) The differential role of Smad2 and Smad3 in the regulation of pro-fibrotic TGFbeta1 responses in human proximal-tubule epithelial cells. *Biochem J* 393: 601–607.
- Xie L, Law BK, Chytil AM, Brown KA, Aakre ME, et al. (2004) Activation of the Erk pathway is required for TGF-beta1-induced EMT in vitro. *Neoplasia* 6: 603–610.
- Schramek H (2002) MAP kinases: from intracellular signals to physiology and disease. *News Physiol Sci* 17: 62–67.
- Schramek H, Feifel E, Marschitz I, Golochchapova N, Gstraunthaler G, et al. (2003) Loss of active MEK1-ERK1/2 restores epithelial phenotype and morphogenesis in transdifferentiated MDCK cells. *Am J Physiol Cell Physiol* 285: C652–661.
- Smith CW, Marlin SD, Rothlein R, Toman C, Anderson DC (1989) Cooperative interactions of LFA-1 and Mac-1 with intercellular adhesion molecule-1 in facilitating adherence and transendothelial migration of human neutrophils in vitro. *J Clin Invest* 83: 2008–2017.
- Holland J, Owens T (1997) Signaling through intercellular adhesion molecule 1 (ICAM-1) in a B cell lymphoma line. The activation of Lyn tyrosine kinase and the mitogen-activated protein kinase pathway. *J Biol Chem* 272: 9108–9112.
- Durieu-Trautmann O, Chaverot N, Cazaubon S, Strosberg AD, Couraud PO (1994) Intercellular adhesion molecule 1 activation induces tyrosine phosphorylation of the cytoskeleton-associated protein cortactin in brain microvessel endothelial cells. *J Biol Chem* 269: 12536–12540.
- Hubbard AK, Rothlein R (2000) Intercellular adhesion molecule-1 (ICAM-1) expression and cell signaling cascades. *Free Radic Biol Med* 28: 1379–1386.
- Chirathaworn C, Tibbetts SA, Chan MA, Benedict SH (1995) Cross-linking of ICAM-1 on T cells induces transient tyrosine phosphorylation and inactivation of cdc2 kinase. *J Immunol* 155: 5479–5482.
- Gardiner EE, D'Souza SE (1999) Sequences within fibrinogen and intercellular adhesion molecule-1 (ICAM-1) modulate signals required for mitogenesis. *J Biol Chem* 274: 11930–11936.
- Hertig A, Anglicheau D, Verine J, Pallet N, Touzot M, et al. (2008) Early epithelial phenotypic changes predict graft fibrosis. *J Am Soc Nephrol* 19: 1584–1591.
- Nishitani Y, Iwano M, Yamaguchi Y, Harada K, Nakatani K, et al. (2005) Fibroblast-specific protein 1 is a specific prognostic marker for renal survival in patients with IgAN. *Kidney Int* 68: 1078–1085.
- Rastaldi MP, Ferrario F, Giardino L, Dell'Antonio G, Grillo C, et al. (2002) Epithelial-mesenchymal transition of tubular epithelial cells in human renal biopsies. *Kidney Int* 62: 137–146.
- Merck E, de Saint-Vis B, Scullier M, Gaillard C, Caux C, et al. (2005) Fc receptor gamma-chain activation via hOSCAR induces survival and maturation of dendritic cells and modulates Toll-like receptor responses. *Blood* 105: 3623–3632.

## Author Contributions

Conceived and designed the experiments: YM. Performed the experiments: YM MW EN. Analyzed the data: YM. Contributed reagents/materials/analysis tools: YM EK. Wrote the paper: YM KI EK.

47. Dussault AA, Pouliot M (2006) Rapid and simple comparison of messenger RNA levels using real-time PCR. *Biol Proced Online* 8: 1–10.
48. Hirakawa S, Hong YK, Harvey N, Schacht V, Matsuda K, et al. (2003) Identification of vascular lineage-specific genes by transcriptional profiling of isolated blood vascular and lymphatic endothelial cells. *Am J Pathol* 162: 575–586.
49. Yasumoto K, Koizumi K, Kawashima A, Saitoh Y, Arita Y, et al. (2006) Role of the CXCL12/CXCR4 axis in peritoneal carcinomatosis of gastric cancer. *Cancer Res* 66: 2181–2187.
50. Lin Y, Buckhaults PJ, Lee JR, Xiong H, Farrell C, et al. (2009) Association of the actin-binding protein transgelin with lymph node metastasis in human colorectal cancer. *Neoplasia* 11: 864–873.
51. Salahshor S, Goncalves J, Chetty R, Gallinger S, Woodgett JR (2005) Differential gene expression profile reveals deregulation of pregnancy specific beta1 glycoprotein 9 early during colorectal carcinogenesis. *BMC Cancer* 5: 66.
52. McColl SR, St-Onge M, Dussault AA, Laflamme C, Bouchard L, et al. (2006) Immunomodulatory impact of the A2A adenosine receptor on the profile of chemokines produced by neutrophils. *FASEB J* 20: 187–189.
53. Law HK, Cheung CY, Ng HY, Sia SF, Chan YO, et al. (2005) Chemokine up-regulation in SARS-coronavirus-infected, monocyte-derived human dendritic cells. *Blood* 106: 2366–2374.
54. Shimaoka M, Kim M, Cohen EH, Yang W, Astrof N, et al. (2006) AL-57, a ligand-mimetic antibody to integrin LFA-1, reveals chemokine-induced affinity up-regulation in lymphocytes. *Proc Natl Acad Sci U S A* 103: 13991–13996.
